# Supplementary material for: Polyphony: superposition independent methods for ensemble-based drug discovery
Source: Springer Nature journal article supplement (doi:10.1186/1471-2105-15-324), 2014-09-30

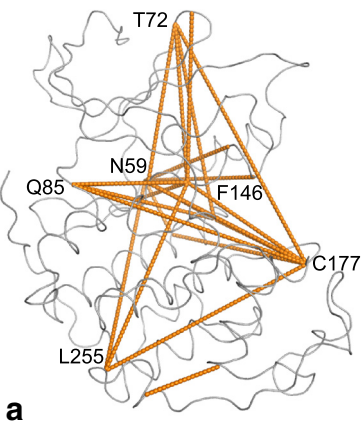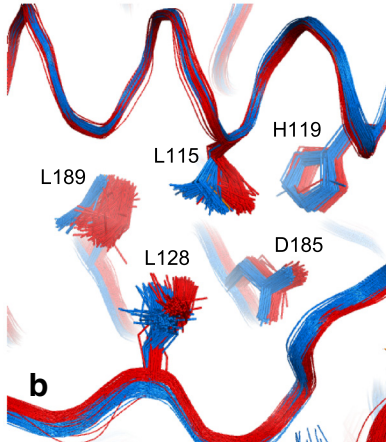

Supplement: 12859_2013_6642_MOESM11_ESM.pdf [file 12859_2013_6642_MOESM11_ESM.pdf]
