# Supplementary material for: Polyphony: superposition independent methods for ensemble-based drug discovery
Source: Springer Nature journal article supplement (doi:10.1186/1471-2105-15-324), 2014-09-30
Supplement: 12859_2013_6642_MOESM16_ESM.pdf [file 12859_2013_6642_MOESM16_ESM.pdf]

High

Medium

Zero

Curvature  $K$ 

$$\kappa = \frac{d\vec{B}}{ds}$$

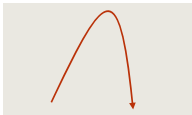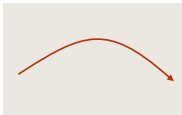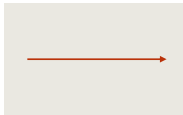Torsion  $T$ 

$$\tau = \frac{d\vec{T}}{ds}$$

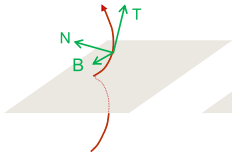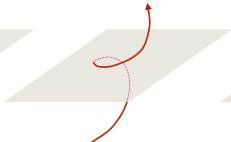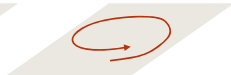

(right handed = +ve)
